# Supplementary material for: Privacy-preserving biological age prediction over federated human methylation data using fully homomorphic encryption
Source: Genome Res. 2024 Sep;34(9):1324–33. doi: 10.1101/gr.279071.124 (PMC11529865; doi:10.1101/gr.279071.124)
Supplement: Supplement 4 [file Supplemental_Table_S1.xlsx]

## Sheet: Train Ages
		Individual Index	Cleartext e-ages	Secure computation e-ages	error percentage	Abs difference
		1	44.9334	45.003	0.00154853	0.0695808
		2	36.2317	36.265	0.000917737	0.0332512
		3	47.9302	47.9644	0.000713091	0.0341786
		4	64.1241	64.1703	0.000720352	0.0461919
		5	-9.07641	-9.13225	0.00615227	0.0558406
		6	59.3938	59.3303	0.00106973	0.0635354
		7	-12.5837	-12.6322	0.00385416	0.0484998
		8	54.4355	54.3343	0.00185818	0.101151
		9	53.3428	53.3638	0.000395124	0.021077
		10	57.417	57.5137	0.00168509	0.0967529
		11	43.8053	43.8477	0.000966483	0.0423371
		12	44.7437	44.7986	0.00122752	0.0549239
		13	-12.9577	-12.9093	0.00374144	0.0484807
		14	47.7816	47.7223	0.00124065	0.0592805
		15	36.4198	36.3875	0.000885135	0.0322364
		16	-18.9419	-18.9865	0.00235452	0.044599
		17	43.8045	43.7779	0.000606485	0.0265667
		18	48.5433	48.4275	0.00238661	0.115854
		19	32.8183	32.84	0.000661433	0.0217071
		20	50.4088	50.3585	0.000998008	0.0503084
		21	65.335	65.3561	0.000323713	0.0211498
		22	58.4138	58.3717	0.000721128	0.0421238
		23	33.7272	33.7972	0.00207654	0.0700358
		24	62.3111	62.3486	0.000601156	0.0374587
		25	26.8117	26.9804	0.00629224	0.168706
		26	48.135	48.0252	0.00228194	0.109841
		27	33.6251	33.6849	0.00177932	0.0598299
		28	55.3881	55.386	3.76122e-05	0.00208327
		29	50.1995	50.2187	0.000382747	0.0192137
		30	51.2656	51.1971	0.00133694	0.0685393
		31	26.3909	26.4465	0.0021067	0.0555976
		32	-6.61335	-6.5831	0.00457345	0.0302458
		33	24.6789	24.7576	0.00319016	0.0787297
		34	52.1745	52.1413	0.000635639	0.0331641
		35	-16.3976	-16.4228	0.00153585	0.0251843
		36	39.3098	39.3852	0.00191921	0.0754439
		37	63.6211	63.7275	0.00167353	0.106472
		38	18.2282	18.2244	0.000204795	0.00373303
		39	34.0468	34.0615	0.000431004	0.0146743
		40	-16.8436	-16.9275	0.00498179	0.0839112
		41	55.6074	55.5919	0.000278113	0.0154651
		42	33.9666	33.9737	0.000209088	0.007102
		43	35.1026	35.111	0.000238094	0.00835772
		44	52.767	52.7955	0.000540316	0.0285108
		45	33.077	33.1256	0.00146729	0.0485337
		46	63.6011	63.5921	0.000142787	0.00908141
		47	54.2217	54.1545	0.0012402	0.0672456
		48	-17.427	-17.4556	0.00163776	0.0285412
		49	54.5604	54.5506	0.00017975	0.00980721
		50	44.3515	44.3544	6.58865e-05	0.00292217
		51	61.7094	61.7849	0.00122419	0.0755442
		52	40.1614	40.2668	0.00262407	0.105386
		53	57.3931	57.3609	0.000561938	0.0322514
		54	26.5837	26.6134	0.00111503	0.0296417
		55	48.8228	48.8003	0.000460234	0.0224699
		56	52.3793	52.3141	0.00124486	0.0652047
		57	67.4169	67.5069	0.00133473	0.0899834
		58	57.9586	57.9778	0.000330857	0.019176
		59	23.4171	23.4618	0.00190945	0.0447138
		60	48.3918	48.3517	0.000828351	0.0400854
		61	56.0375	56.0605	0.000410248	0.0229893
		62	37.7361	37.7292	0.000182722	0.0068952
		63	-7.68264	-7.73589	0.00693091	0.0532476
		64	-14.7351	-14.6403	0.00643416	0.094808
		65	33.2681	33.3655	0.0029261	0.097346
		66	40.2126	40.1648	0.00118976	0.0478433
		67	45.0051	44.9949	0.000225102	0.0101307
		68	52.6974	52.6601	0.000708602	0.0373415
		69	24.4087	24.3842	0.0010065	0.0245674
		70	57.3659	57.3619	6.92559e-05	0.00397293
		71	26.5099	26.519	0.00033978	0.00900756
		72	48.4066	48.3852	0.000441498	0.0213714
		73	49.5735	49.6186	0.000909238	0.0450741
		74	51.3569	51.2595	0.0018949	0.0973161
		75	-7.66819	-7.66703	0.000152304	0.0011679
		76	53.9752	53.8987	0.00141849	0.0765631
		77	49.4577	49.5143	0.00114414	0.0565865
		78	49.7126	49.6738	0.00077906	0.0387291
		79	-3.37539	-3.41218	0.0109008	0.0367945
		80	60.4872	60.526	0.000640099	0.0387178
		81	31.5872	31.6241	0.00116847	0.0369087
		82	24.8403	24.8496	0.000376636	0.00935575
		83	54.7267	54.7829	0.00102661	0.0561832
		84	-17.1254	-17.0876	0.00220858	0.0378229
		85	54.1069	54.1884	0.00150565	0.0814658
		86	56.5175	56.4657	0.00091673	0.0518113
		87	51.4379	51.4575	0.000380937	0.0195946
		88	30.2333	30.2692	0.00118897	0.0359464
		89	19.6314	19.7028	0.0036394	0.0714463
		90	22.3917	22.3963	0.000206698	0.00462832
		91	49.3065	49.4672	0.00326046	0.160762
		92	-8.60116	-8.63523	0.00396169	0.0340751
		93	51.7439	51.7176	0.000508426	0.0263079
		94	36.6264	36.6612	0.000948008	0.0347221
		95	-15.5094	-15.5816	0.00465706	0.0722282
		96	48.1057	48.0902	0.000321477	0.0154649
		97	52.856	52.8547	2.33222e-05	0.00123272
		98	50.8507	50.9176	0.00131489	0.0668632
		99	-17.0772	-17.0633	0.000817246	0.0139563
		100	49.2471	49.2075	0.00080489	0.0396385
		101	64.8881	64.9669	0.00121387	0.0787657
		102	51.5928	51.6579	0.00126335	0.0651797
		103	-17.8393	-17.8819	0.00238591	0.042563
		104	53.8987	53.9386	0.000739371	0.0398511
		105	36.7444	36.6556	0.00241696	0.0888098
		106	54.8333	54.7628	0.00128498	0.0704595
		107	63.0724	63.1098	0.000593116	0.0374092
		108	31.5242	31.4948	0.000932363	0.029392
		109	44.5466	44.465	0.00183114	0.081571
		110	47.373	47.4473	0.00156916	0.074336
		111	2.66031	2.69731	0.0139087	0.0370014
		112	26.8275	26.8491	0.000803736	0.0215622
		113	-9.45995	-9.46832	0.00088489	0.00837101
		114	34.658	34.623	0.00100824	0.0349435
		115	41.5019	41.5338	0.000769196	0.0319231
		116	50.208	50.1411	0.00133119	0.0668365
		117	64.9863	64.9946	0.00012868	0.00836245
		118	54.4433	54.2971	0.00268499	0.14618
		119	38.2476	38.3558	0.00282854	0.108185
		120	37.1674	37.2033	0.000966272	0.0359138
		121	26.1602	26.1858	0.000976407	0.025543
		122	57.5799	57.6248	0.000779774	0.0448993
		123	36.7983	36.8298	0.000857128	0.0315408
		124	49.4423	49.372	0.00142139	0.0702765
		125	43.303	43.1873	0.00267241	0.115723
		126	-15.0646	-15.0845	0.00131769	0.0198506
		127	63.7667	63.736	0.000482309	0.0307553
		128	36.43	36.5255	0.00262144	0.0954992
		129	60.305	60.3301	0.000415037	0.0250289
		130	61.7581	61.7399	0.000294298	0.0181753
		131	-16.3439	-16.3705	0.00163017	0.0266433
		132	-8.29868	-8.30792	0.00111354	0.00924091
		133	55.1661	55.2003	0.000621109	0.0342642
		134	64.4752	64.4667	0.000131368	0.00847
		135	51.0502	51.027	0.000453695	0.0231612
		136	-9.11096	-9.13315	0.00243554	0.0221901
		137	55.9546	55.9538	1.47236e-05	0.000823854
		138	-10.8091	-10.8386	0.0027359	0.0295725
		139	43.8182	43.7617	0.00128918	0.0564895
		140	7.03733	7.04339	0.000862081	0.00606674
		141	50.6515	50.6711	0.000385951	0.019549
		142	26.4408	26.4908	0.00189105	0.0500008
		143	38.6785	38.7376	0.00152646	0.0590412
		144	-6.82503	-6.78158	0.00636758	0.043459
		145	53.2512	53.1987	0.000987368	0.0525786
		146	20.8174	20.8106	0.000327623	0.00682027
		147	44.1672	44.2617	0.00214115	0.0945685
		148	49.9462	50.0308	0.0016932	0.0845687
		149	-18.2499	-18.2296	0.00110973	0.0202525
		150	49.1802	49.244	0.00129698	0.0637855
		151	73.1876	73.2314	0.00059852	0.0438042
		152	49.2237	49.1716	0.00105841	0.0520987
		153	35.902	35.9884	0.00240748	0.0864331
		154	34.4427	34.4591	0.00047562	0.0163816
		155	47.0344	46.937	0.00207115	0.0974152
		156	44.1236	44.0829	0.000923566	0.0407511
		157	48.9071	48.877	0.000613559	0.0300073
		158	-7.96927	-8.03402	0.00812547	0.0647541
		159	31.2028	31.1887	0.000451974	0.0141029
		160	61.1078	61.1021	9.32842e-05	0.00570039
		161	63.0432	63.0409	3.64712e-05	0.00229926
		162	70.0727	70.109	0.000518598	0.0363396
		163	49.1132	49.1474	0.000697568	0.0342597
		164	47.3781	47.3058	0.00152531	0.0722664
		165	33.9397	33.9266	0.000383868	0.0130283
		166	20.5652	20.5963	0.00151502	0.0311566
		167	51.4213	51.4346	0.000259201	0.0133284
		168	41.2029	41.3821	0.00434744	0.179127
		169	48.1458	48.1195	0.000546411	0.0263074
		170	39.5376	39.4509	0.00219138	0.0866419
		171	60.0786	60.1489	0.00117175	0.0703969
		172	56.9037	56.9171	0.000235042	0.0133748
		173	52.1449	52.1799	0.000672735	0.0350796
		174	14.6948	14.8051	0.00750842	0.110334
		175	54.1885	54.2093	0.000382949	0.0207514
		176	51.3008	51.2302	0.00137659	0.07062
		177	58.4319	58.3203	0.00190901	0.111547
		178	39.5925	39.6079	0.000387984	0.0153612
		179	22.4844	22.5483	0.0028404	0.0638647
		180	-17.2899	-17.2922	0.000131026	0.00226543
		181	23.5672	23.6174	0.00212945	0.0501852
		182	60.7304	60.6872	0.00071262	0.0432777
		183	-15.2849	-15.3933	0.00709384	0.108428
		184	47.7362	47.601	0.00283181	0.135179
		185	-2.92828	-2.87255	0.0190345	0.0557384
		186	39.2049	39.1272	0.00198204	0.0777057
		187	58.461	58.4154	0.000779286	0.0455578
		188	59.7474	59.7887	0.000690778	0.0412722
		189	-18.5228	-18.5669	0.00237853	0.0440572
		190	46.813	46.8021	0.000233818	0.0109457
		191	-15.8212	-15.8306	0.000592516	0.00937433
		192	-17.3588	-17.3807	0.00126371	0.0219364
		193	25.3049	25.3368	0.00126017	0.0318885
		194	58.0194	58.0551	0.000616299	0.0357573
		195	49.8563	49.9376	0.00163075	0.0813035
		196	38.3989	38.4346	0.000928575	0.0356563
		197	72.2799	72.2389	0.000567843	0.0410436
		198	-18.3142	-18.4016	0.00477089	0.0873751
		199	47.7929	47.782	0.0002283	0.0109111
		200	54.6105	54.5945	0.000292392	0.0159677
		201	-10.698	-10.7779	0.00747726	0.0799914
		202	23.4066	23.481	0.00317989	0.0744304
		203	-1.07514	-1.05216	0.0213678	0.0229733
		204	30.9941	31.0423	0.00155431	0.0481745
		205	29.8763	29.8601	0.000543088	0.0162255
		206	-14.5455	-14.5387	0.000464037	0.00674964
		207	32.6591	32.6257	0.00102294	0.0334084
		208	48.4761	48.4989	0.000471205	0.0228422
		209	-17.7689	-17.7569	0.000673876	0.011974
		210	50.1423	50.1581	0.000316074	0.0158487
		211	59.5989	59.659	0.0010077	0.0600576
		212	61.4213	61.3008	0.00196238	0.120532
		213	73.4258	73.4457	0.000271581	0.0199411
		214	6.51333	6.48765	0.00394288	0.0256813
		215	47.9871	47.9868	7.08245e-06	0.000339867
		216	51.9114	51.7808	0.00251497	0.130556
		217	57.18	57.1927	0.000222111	0.0127003
		218	49.822	49.7512	0.00142024	0.0707591
		219	53.3879	53.4	0.00022734	0.0121372
		220	55.0235	55.0299	0.000117862	0.00648519
		221	56.0513	56.0462	9.13395e-05	0.0051197
		222	38.2736	38.328	0.00142321	0.0544712
		223	51.2522	51.2291	0.000450918	0.0231105
		224	23.6527	23.6274	0.00107063	0.0253232
		225	49.5776	49.5936	0.000322221	0.015975
		226	-8.1887	-8.15372	0.00427104	0.0349743
		227	59.7858	59.8222	0.000609977	0.036468
		228	49.2193	49.2694	0.00101832	0.0501209
		229	33.1895	33.1848	0.00014175	0.00470462
		230	21.6866	21.6361	0.00232807	0.0504878
		231	45.2647	45.3322	0.00149101	0.0674901
		232	51.3901	51.3724	0.000345859	0.0177737
		233	55.5522	55.5685	0.000292698	0.01626
		234	48.1465	48.0532	0.00193741	0.0932793
		235	52.1149	52.1413	0.000506259	0.0263836
		236	-14.7946	-14.7964	0.000121481	0.00179727
		237	44.1412	44.1488	0.000172402	0.00761002
		238	58.2108	58.2085	3.92593e-05	0.00228532
		239	47.6954	47.7205	0.000526131	0.025094
		240	38.8746	38.8535	0.000541177	0.021038
		241	25.0187	25.0325	0.000550416	0.0137707
		242	42.8354	42.7507	0.00197673	0.084674
		243	26.4977	26.5389	0.00155828	0.0412907
		244	24.9351	24.9061	0.00116602	0.0290748
		245	53.3199	53.2739	0.000863969	0.0460668
		246	60.7123	60.7731	0.0010021	0.0608399
		247	41.267	41.1786	0.00214078	0.0883434
		248	46.8841	46.8703	0.000294284	0.0137972
		249	56.8247	56.9262	0.00178683	0.101536
		250	35.6869	35.6942	0.000203581	0.00726516
		251	52.6532	52.6693	0.000305943	0.0161089
		252	28.4978	28.4881	0.000341643	0.00973607
		253	43.8181	43.8632	0.00102998	0.0451318
		254	35.6871	35.6503	0.00102938	0.0367356
		255	49.6134	49.6453	0.000643429	0.0319227
		256	56.7403	56.8181	0.00137213	0.0778551
		257	52.1808	52.2129	0.000615726	0.0321291
		258	54.2222	54.3326	0.00203607	0.1104
		259	10.0109	10.0049	0.000603528	0.00604188
		260	47.2749	47.3449	0.00148135	0.0700305
		261	55.3199	55.3285	0.000155535	0.00860416
		262	-16.1915	-16.2666	0.00463643	0.075071
		263	14.1157	14.1749	0.00419379	0.0591984
		264	47.4064	47.3312	0.00158504	0.0751409
		265	44.8789	44.8993	0.000455889	0.0204598
		266	-15.1556	-15.2697	0.00752824	0.114095
		267	23.5471	23.5959	0.00207443	0.0488467
		268	52.3536	52.3083	0.000865456	0.0453097
		269	56.4129	56.5314	0.00210049	0.118495
		270	-17.2659	-17.2816	0.00091141	0.0157363
		271	-15.2537	-15.2405	0.000866355	0.0132151
		272	-17.5747	-17.5935	0.00106976	0.0188007
		273	51.5256	51.5645	0.000756079	0.0389574
		274	57.3837	57.4833	0.00173591	0.0996128
		275	21.5514	21.5906	0.00181949	0.0392126
		276	52.1042	52.1262	0.000421611	0.0219677
		277	45.7779	45.7843	0.00014111	0.0064597
		278	44.6608	44.6778	0.000381259	0.0170274
		279	22.8438	22.9656	0.00533152	0.121792
		280	7.07919	7.15947	0.0113389	0.0802705
		281	-16.491	-16.4436	0.00287604	0.0474289
		282	33.21	33.1957	0.000432618	0.0143673
		283	37.1232	37.1032	0.000539412	0.0200247
		284	25.2764	25.3825	0.00419524	0.106041
		285	39.9108	39.895	0.000396374	0.0158196
		286	-10.2255	-10.2798	0.0053083	0.0542799
		287	-16.646	-16.7248	0.00473646	0.0788429
		288	17.9971	18.0018	0.000262953	0.00473239
		289	57.3657	57.4005	0.000606375	0.0347851
		290	46.7066	46.7849	0.00167721	0.0783369
		291	51.1217	51.0771	0.000871812	0.0445685
		292	28.7694	28.7878	0.00063966	0.0184026
		293	13.7293	13.7297	2.37077e-05	0.00032549
		294	55.6322	55.6209	0.000203299	0.01131
		295	62.6743	62.7449	0.00112652	0.0706036
		296	45.1099	45.1819	0.00159718	0.0720484
		297	43.7917	43.8163	0.000563447	0.0246743
		298	-17.993	-18.008	0.0008346	0.015017
		299	59.1279	59.0604	0.00114075	0.0674503
		300	54.7469	54.6717	0.00137419	0.0752327
		301	58.4791	58.4765	4.58456e-05	0.00268101
		302	36.1005	36.039	0.00170443	0.0615307
		303	26.8183	26.8131	0.000194904	0.00522699
		304	57.0165	56.9358	0.00141524	0.0806921
		305	24.0378	24.0346	0.000131406	0.00315871
		306	-4.68129	-4.66069	0.00440042	0.0205997
		307	64.1729	64.0809	0.00143393	0.0920192
		308	-2.69968	-2.73769	0.0140783	0.0380069
		309	45.4737	45.5192	0.00100105	0.0455212
		310	41.9007	41.9502	0.00118154	0.0495072
		311	64.4106	64.4331	0.000349762	0.0225283
		312	-8.67978	-8.66204	0.00204407	0.0177421
		313	60.4058	60.3331	0.00120207	0.0726122
		314	63.3571	63.3201	0.000584084	0.0370059
		315	55.426	55.4645	0.000694457	0.038491
		316	32.4519	32.5687	0.00360055	0.116845
		317	28.3397	28.3724	0.00115216	0.0326518
		318	43.7404	43.6751	0.00149143	0.0652357
		319	44.0732	44.073	3.81557e-06	0.000168165
		320	-17.3154	-17.2561	0.00342465	0.0592993
		321	55.7779	55.8024	0.000438406	0.0244534
		322	27.8176	27.7784	0.00141063	0.0392404
		323	56.1918	56.1555	0.000646532	0.0363298
		324	52.3429	52.3466	7.00799e-05	0.00366819
		325	-16.9231	-16.9074	0.000929953	0.0157377
		326	75.1045	75.1565	0.000693621	0.052094
		327	47.1193	46.9762	0.00303724	0.143113
		328	19.5738	19.635	0.0031296	0.0612582
		329	46.3504	46.2781	0.00155921	0.0722698
		330	-12.2933	-12.2219	0.00581109	0.0714374
		331	61.1969	61.1717	0.000411659	0.0251923
		332	54.1261	54.0455	0.0014898	0.0806372
		333	64.4055	64.4138	0.00012852	0.00827739
		334	58.685	58.6706	0.00024556	0.0144107
		335	28.3972	28.4426	0.00159942	0.045419
		336	26.7502	26.7726	0.000837665	0.0224077
		337	54.599	54.5996	9.93578e-06	0.000542484
		338	33.5483	33.5466	5.06818e-05	0.00170029
		339	-17.7471	-17.7543	0.000405569	0.00719769
		340	41.41	41.4138	9.12277e-05	0.00377774
		341	39.5862	39.5071	0.00199905	0.0791347
		342	39.0952	39.0809	0.000366704	0.0143364
		343	59.8743	59.8583	0.000266465	0.0159544
		344	59.7728	59.7077	0.0010899	0.0651465
		345	56.8241	56.811	0.000231	0.0131264
		346	39.4567	39.4104	0.00117351	0.0463029
		347	28.6561	28.669	0.000451511	0.0129385
		348	-16.4821	-16.4343	0.00290056	0.0478074
		349	46.288	46.3153	0.000591205	0.0273657
		350	-18.254	-18.2403	0.000752721	0.0137402
		351	53.51	53.5339	0.000445867	0.0238584
		352	47.533	47.518	0.000314316	0.0149404
		353	51.6288	51.5785	0.000974698	0.0503225
		354	24.9539	24.9722	0.000734554	0.01833
		355	23.1911	23.1267	0.00277506	0.0643566
		356	52.609	52.5438	0.00123832	0.0651467
		357	53.8816	53.9877	0.0019691	0.106098
		358	48.2417	48.239	5.64043e-05	0.00272104
		359	44.3114	44.3432	0.000719356	0.0318757
		360	45.806	45.7958	0.000223978	0.0102595
		361	43.3695	43.385	0.000358948	0.0155674
		362	25.5327	25.5424	0.000381689	0.00974555
		363	59.7634	59.7393	0.000403356	0.0241059
		364	45.1077	45.0919	0.000351371	0.0158495
		365	41.9206	41.8392	0.00194253	0.0814323
		366	58.6702	58.666	7.14528e-05	0.00419215
		367	-7.45248	-7.47828	0.0034611	0.0257938
		368	52.9871	53.003	0.000299271	0.0158575
		369	56.0032	55.9337	0.00124166	0.0695369
		370	-17.8246	-17.7783	0.00259739	0.0462973
		371	43.43	43.4622	0.000741491	0.0322029
		372	-16.5211	-16.4834	0.002283	0.0377176
		373	43.0648	43.0406	0.000560773	0.0241496
		374	42.5781	42.5261	0.00122198	0.0520297
		375	26.2054	26.2099	0.000174012	0.00456005
		376	40.6945	40.7861	0.00225041	0.0915794
		377	44.2909	44.3633	0.0016354	0.0724333
		378	46.577	46.5354	0.000894666	0.0416709
		379	2.45583	2.45609	0.000103216	0.000253482
		380	49.1659	49.1407	0.000513808	0.0252619
		381	59.0123	58.9672	0.000764197	0.045097
		382	51.223	51.292	0.00134558	0.0689245
		383	54.0407	53.977	0.00117971	0.0637526
		384	61.0691	61.1346	0.00107162	0.0654426
		385	53.6473	53.5771	0.00130907	0.070228
		386	47.4192	47.4071	0.000255388	0.0121103
		387	61.433	61.4016	0.000511064	0.0313962
		388	24.1764	24.2035	0.00112357	0.0271639
		389	34.2503	34.1846	0.00191935	0.0657383
		390	-13.9439	-13.9576	0.000982356	0.0136978
		391	52.5598	52.5069	0.00100678	0.0529161
		392	47.1718	47.1936	0.000461337	0.0217621
		393	29.7746	29.7409	0.00113199	0.0337046
		394	-15.6906	-15.7146	0.00152863	0.0239852
		395	59.4466	59.3779	0.00115493	0.0686565
		396	-1.8105	-1.73711	0.0405397	0.0733972
		397	55.6133	55.4768	0.00245329	0.136435
		398	23.6544	23.625	0.00124569	0.0294662
		399	-8.43978	-8.51438	0.00883942	0.0746027
		400	59.9539	59.9183	0.000594581	0.0356475
		401	51.2595	51.1422	0.00228796	0.11728
		402	35.9148	36.0444	0.00360771	0.12957
		403	41.8256	41.8987	0.0017478	0.0731028
		404	67.407	67.4382	0.000464316	0.0312981
		405	-2.00487	-2.10405	0.0494691	0.0991791
		406	67.1245	67.1249	6.34827e-06	0.000426124
		407	-6.57195	-6.6031	0.00473909	0.0311451
		408	48.2504	48.2825	0.000664597	0.0320671
		409	25.5229	25.4845	0.00150125	0.0383161
		410	2.53904	2.62706	0.0346672	0.0880213
		411	53.9264	53.8868	0.000733463	0.039553
		412	-17.4169	-17.4375	0.00117767	0.0205115
		413	31.6437	31.6534	0.00030433	0.00963013
		414	53.5676	53.5243	0.00080848	0.0433084
		415	45.0155	45.0375	0.000489264	0.0220245
		416	55.9518	55.9756	0.000424636	0.0237591
		417	56.2037	56.196	0.00013651	0.00767239
		418	46.7679	46.7819	0.000299269	0.0139962
		419	41.1475	41.0523	0.00231255	0.0951558
		420	61.738	61.7654	0.000444383	0.0274353
		421	38.9658	38.9731	0.000186408	0.00726355
		422	12.4729	12.4243	0.00389581	0.0485922
		423	45.521	45.53	0.000199101	0.00906327
		424	35.6172	35.513	0.00292346	0.104125
		425	30.7393	30.7536	0.000463015	0.0142328
		426	37.5668	37.6396	0.00193877	0.0728332
		427	50.6741	50.7588	0.00167305	0.0847802
		428	50.4642	50.4572	0.000138281	0.00697825
		429	35.636	35.6147	0.000596521	0.0212576
		430	49.0825	49.1841	0.00207051	0.101626
		431	39.4406	39.4718	0.000789893	0.0311539
		432	26.3001	26.3372	0.00140834	0.0370394
		433	21.4467	21.4529	0.000286229	0.00613867
		434	44.7581	44.8439	0.00191787	0.0858404
		435	-7.77692	-7.94583	0.0217197	0.168912
		436	44.3893	44.3384	0.00114765	0.0509433
		437	24.516	24.4919	0.000983928	0.024122
		438	-16.2009	-16.2353	0.00212298	0.0343941
		439	-9.21638	-9.2925	0.00825969	0.0761244
		440	20.8775	20.8636	0.000663562	0.0138535
		441	54.3739	54.3588	0.00027859	0.0151481
		442	55.7576	55.6956	0.00111168	0.0619847
		443	49.5343	49.5496	0.000308487	0.0152807
		444	56.2179	56.2333	0.000273328	0.0153659
		445	54.0324	54	0.000600605	0.0324521
		446	55.4906	55.5096	0.000341298	0.0189388
		447	68.9735	68.9634	0.000146345	0.0100939
		448	53.0462	53.0028	0.000817229	0.0433509
		449	26.8142	26.7659	0.00180028	0.0482732
		450	49.7878	49.8475	0.00119871	0.059681
		451	-14.791	-14.8894	0.00665654	0.0984568
		452	61.9836	62.0226	0.000628511	0.0389574
		453	27.1685	27.1603	0.00030188	0.00820161
		454	42.3646	42.3815	0.000398824	0.016896
		455	51.8032	51.8049	3.36847e-05	0.00174497
		456	59.7767	59.8363	0.000996269	0.0595537
		457	56.0592	56.0427	0.00029504	0.0165397
		458	48.9504	48.8974	0.00108381	0.0530528
		459	55.4295	55.3228	0.00192441	0.106669
		460	-16.5708	-16.5658	0.000299655	0.00496551
		461	28.7651	28.8299	0.00225277	0.0648012
		462	46.7359	46.6887	0.00100972	0.0471901
		463	61.7468	61.775	0.000457633	0.0282573
		464	28.2607	28.2287	0.00113008	0.0319367
		465	41.0339	41.0757	0.00101822	0.0417816
		466	24.7353	24.7412	0.000237854	0.00588338
		467	34.527	34.5455	0.000534689	0.0184612
		468	35.3362	35.2491	0.00246583	0.087133
		469	53.2273	53.3193	0.00172802	0.091978
		470	53.4273	53.3957	0.000591442	0.0315991
		471	23.0104	23.0327	0.000966296	0.0222349
		472	59.7098	59.6096	0.00167751	0.100164

## Sheet: Test Ages
			Orig Ages (clear text)	Predicted Ages	Diff
			33.5174	33.5878	0.00209904
			-6.932	-6.93916	0.00103396
			27.6815	27.7294	0.00173265
			41.9747	41.9342	0.000963151
			46.7496	46.7176	0.000684431
			43.611	43.5906	0.000468689
			49.8541	49.8825	0.000570172
			19.2783	19.2404	0.00196361
			47.2454	47.2955	0.00106081
			45.5082	45.4475	0.00133386
			41.5873	41.6056	0.000440158
			24.4734	24.5785	0.00429544
			47.9095	47.9168	0.000152312
			51.5094	51.5184	0.000174843
			59.6557	59.5877	0.00113916
			54.5915	54.5255	0.0012083
			49.8073	49.8629	0.00111615
			52.4132	52.3648	0.00092178
			42.0122	42.0247	0.000297489
			54.7021	54.7245	0.000410754
			-16.4156	-16.5002	0.0051521
			-19.6932	-19.7304	0.00188773
			38.8761	38.9553	0.00203678
			43.5905	43.617	0.000608068
			52.0292	52.0216	0.00014608
			60.3433	60.4154	0.00119526
			29.2245	29.2883	0.00218215
			44.7929	44.812	0.000426155
			18.9946	19.0779	0.00438668
			50.6477	50.6459	3.64845e-05
			-16.197	-16.2357	0.00238365
			43.8014	43.8203	0.000429846
			62.2076	62.1793	0.000456207
			45.4503	45.6111	0.0035364
			-4.46297	-4.39052	0.0162336
			51.6962	51.7161	0.000386387
			-6.42651	-6.47803	0.00801611
			51.4092	51.493	0.00162837
			47.1346	47.0893	0.000960581
			46.4729	46.4562	0.000360059
			64.0482	64.0605	0.000190989
			50.2514	50.2303	0.000421334
			22.5642	22.5058	0.00258777
			-17.6979	-17.7128	0.000845137
			28.5466	28.5517	0.000176532
			47.5854	47.5034	0.00172324
			39.7311	39.6576	0.00184945
			24.6062	24.6392	0.00134118
			48.3436	48.2881	0.00114896
			57.6017	57.4986	0.00178938
			39.0591	38.9995	0.00152684
			43.1515	43.1401	0.000265334
			53.1114	53.1065	9.19212e-05
			61.0755	61.1255	0.000817809
			-16.9251	-16.9498	0.00146308
			-17.829	-17.8536	0.00138016
			57.1621	57.176	0.000242647
			-14.6047	-14.5632	0.00284443
			32.2567	32.2548	5.88287e-05
			47.8885	47.9067	0.000380301
			52.6127	52.6254	0.000241662
			40.2306	40.2454	0.000367643
			-3.32506	-3.35507	0.00902693
			-8.42422	-8.42296	0.000149662
			26.1775	26.2116	0.00130247
			-17.6123	-17.6131	5.08561e-05
			51.6017	51.6296	0.000539321
			50.3933	50.4883	0.00188528
			68.0974	68.0363	0.000898448
			-17.3626	-17.3906	0.00161596
			23.3871	23.3805	0.000280683
			-13.6192	-13.6622	0.00315586
			32.1314	32.0417	0.00279051
			-8.17538	-8.10895	0.00812523
			69.7251	69.7482	0.000330916
			63.9247	63.9229	2.74387e-05
			21.2502	21.2833	0.00155859
			-10.1362	-10.0878	0.00478321
			61.3589	61.3902	0.000509771
			50.1284	50.1123	0.000322178
			47.3612	47.3868	0.000539541
			44.8836	44.9532	0.00155021
			25.8963	25.9092	0.000498504
			46.0697	46.0726	6.21804e-05
			42.895	42.9094	0.000334863
			34.484	34.5177	0.000977304
			53.5516	53.6421	0.00168869
			50.234	50.1859	0.000957157
			32.2253	32.2557	0.000940942
			26.8512	26.9256	0.0027707
			51.7052	51.6863	0.000364752
			44.05	43.9382	0.00253771
			52.883	52.8385	0.000842678
			-8.25507	-8.24283	0.00148363
			47.0791	47.0945	0.00032823
			32.7488	32.7857	0.00112517
			49.3834	49.3238	0.00120708
			66.2175	66.2397	0.000333789
			-14.2773	-14.2288	0.00340147
			17.8858	17.8662	0.00109113
			42.0582	42.0311	0.000645507
			-15.5703	-15.5378	0.00208811
			60.1818	60.062	0.00199057
			-16.3601	-16.4033	0.00264237
			38.2727	38.2699	7.48013e-05
			66.9131	66.8748	0.000572017
			26.9732	27.0043	0.00115202
			65.5288	65.5129	0.000242793
			29.1744	29.3002	0.00431025
			-16.5076	-16.5642	0.00342766
			49.932	49.858	0.00148178
			51.5238	51.4781	0.000887284
			6.41298	6.43511	0.00345021
			3.10299	3.15426	0.0165246
			55.9874	55.9626	0.000441838
			43.2008	43.1672	0.000778156
			49.5565	49.6615	0.00211833
			24.3554	24.3187	0.0015054
			48.3688	48.3238	0.000930357
			41.0844	41.0294	0.00133989
			22.4216	22.3333	0.00393629
			54.7962	54.779	0.000314991
			25.2134	25.2235	0.000398944
			30.6329	30.6205	0.000405886
			56.014	55.9608	0.000948408
			-15.1156	-15.1402	0.00162747
			47.1484	47.1	0.00102514
			58.8725	58.8797	0.000121907
			40.8267	40.9114	0.0020737
			29.7645	29.7953	0.00103267
			36.6425	36.7105	0.0018545
			62.2283	62.1924	0.000576762
			49.2154	49.2747	0.0012051
			45.4739	45.4134	0.00132905
			55.9364	56.0157	0.00141836
			35.2636	35.2233	0.00114285
			56.6036	56.6129	0.000165079
			50.8874	50.8635	0.000469778
			7.11927	7.13561	0.00229517
			47.1444	47.2253	0.00171613
			41.0138	41.0325	0.000455927
			29.3142	29.274	0.00137104
			57.8797	57.8968	0.000294824
			40.9529	40.9832	0.000738365
			52.3998	52.3802	0.000374215
			42.4124	42.5276	0.00271787
			62.8968	62.9341	0.000593217
			-7.85305	-7.89666	0.00555336
			49.0944	49.142	0.000968989
			39.9402	39.988	0.00119493
			-15.3986	-15.3946	0.000263504
			43.9282	43.9329	0.000107834
			-4.98914	-4.99919	0.00201395
			56.3694	56.3465	0.000407503
			48.1515	48.1487	5.78934e-05
			54.9446	55.0347	0.00163948
			50.8099	50.7877	0.000436001
			44.6242	44.5218	0.0022955
			47.7226	47.7305	0.000165082
			52.3622	52.4047	0.000811821
			54.5607	54.5789	0.000333433
			68.7698	68.6675	0.00148754
			-18.4879	-18.5263	0.00207935
			-16.5818	-16.592	0.000616679
			48.9631	48.9017	0.00125271
			43.5995	43.6459	0.00106322
			51.158	51.2072	0.000960748
			-17.8182	-17.7518	0.00372172
			24.188	24.1908	0.000116381
			46.1423	46.2004	0.00125936
			-12.4721	-12.5699	0.00784254
			48.9424	48.9303	0.000247751
			31.1799	31.2304	0.00161916
			56.8017	56.8124	0.000187635
			58.4683	58.4942	0.000442953
			21.1295	21.1684	0.00184139
			28.9339	28.8774	0.0019501
			52.3525	52.3457	0.000129133
			36.549	36.5407	0.000226719
			52.0576	52.0302	0.000525799
			22.5831	22.6168	0.00149478
			21.0382	21.0393	5.19189e-05
			51.6325	51.6619	0.000569515
			57.3888	57.3244	0.00112269
			60.5884	60.582	0.000106444
			46.1005	45.9624	0.00299543
			12.3295	12.3691	0.00321168
			55.4137	55.4654	0.000933912
			58.6873	58.6846	4.71375e-05
			41.5271	41.5612	0.000821126
			58.75	58.7667	0.000284356
			23.5097	23.63	0.00511742
			30.6165	30.5288	0.00286231
			-14.4957	-14.5871	0.00630515
			53.4367	53.3664	0.00131478
			36.0824	36.0618	0.000571006
			58.6435	58.596	0.000809141
			56.6586	56.6454	0.000232643
			50.7002	50.6765	0.000467843
			67.3043	67.271	0.000495019
			57.1337	57.2444	0.00193661
			36.7293	36.7844	0.00149852
			4.13617	4.06034	0.0183315
